# Supplementary material
Source: publisher site journal article supplement (https://www.dovepress.com/article/159432)
Supplement: Supplementary file 1 [file get_supplementary_file.php]

# VEGF SIGNALING PATHWAY

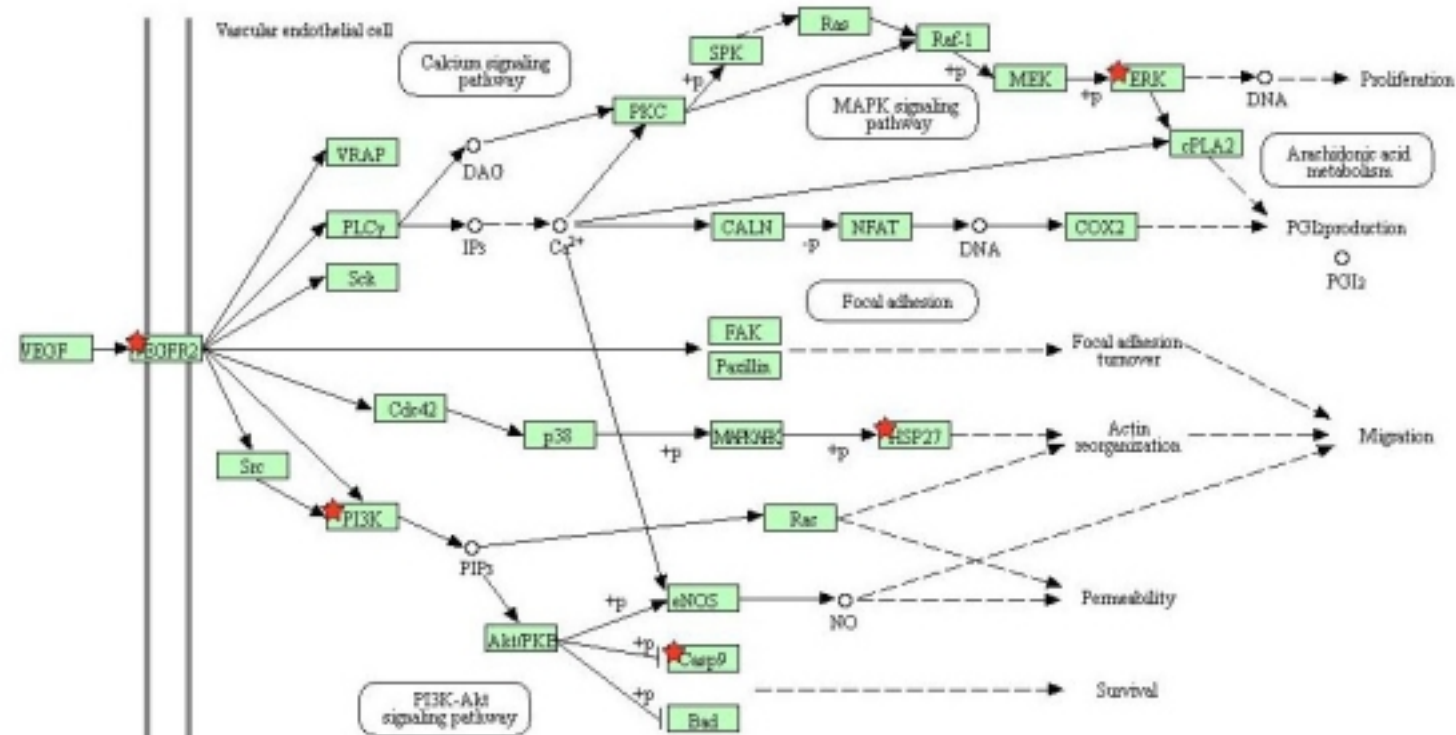

*No depression*      *Mild depression*      *Moderate / severe depression*

**HSPA8**

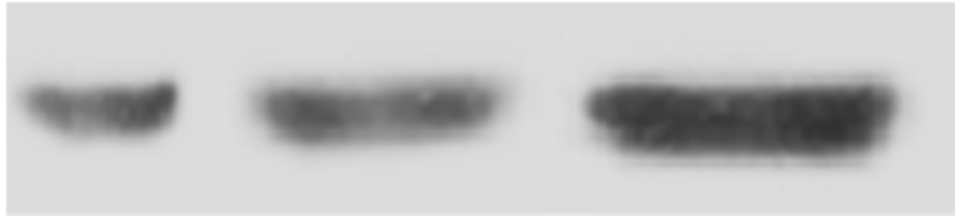

**HSP90AA1**

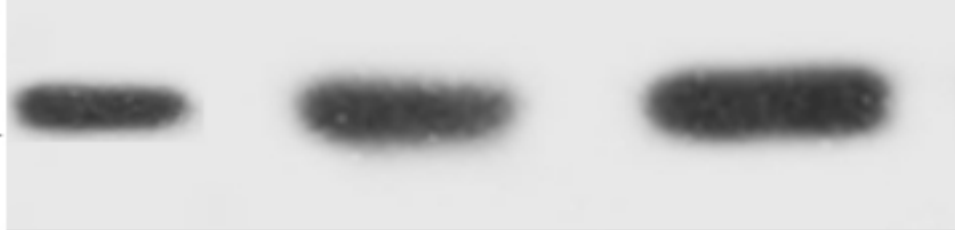

**β-action**

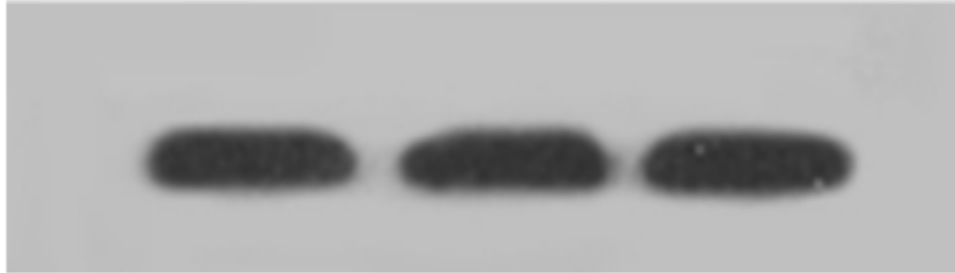

**HSPA8**

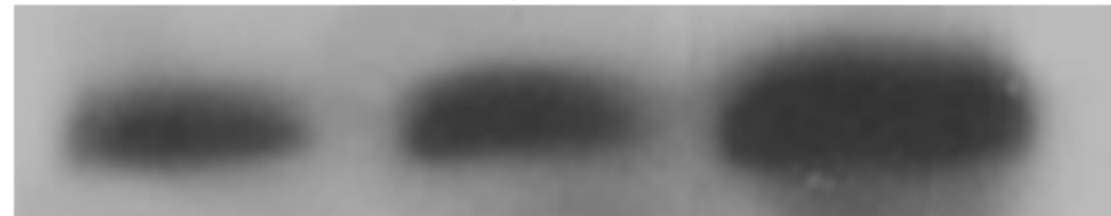

**HSP90AA1**

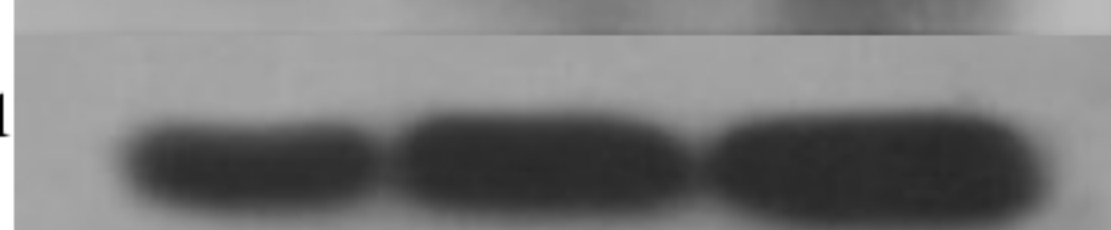

**β-action**

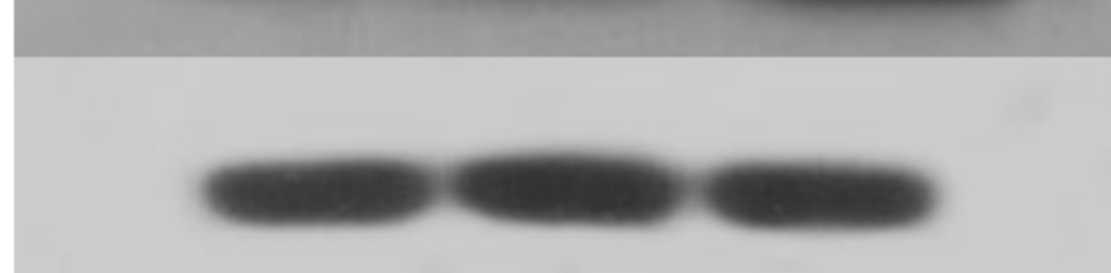

**Table S1.** Proteomic comparison of HCC tissues from patients with or without depression revealed 89 proteins that were up-regulated and 44 that were down-regulated in the presence of depression.

| Accession ID                 | Protein name (gene name) | (95%) peptides | %COV  | Gene locus   | Log <sub>2</sub> (fold change) | -log <sub>10</sub> (P value) |
|------------------------------|--------------------------|----------------|-------|--------------|--------------------------------|------------------------------|
| <b>Up-regulated proteins</b> |                          |                |       |              |                                |                              |
| P 08238                      | HSP90AA1                 | 7              | 41.26 | 14q32.3      | 2.64385619                     | 4.924453039                  |
| P 07900                      | PDK1                     | 8              | 47.68 | 10p15.1      | 1.056583528                    | 4.882728704                  |
| P 11142                      | HSPA8                    | 11             | 57.13 | 11q24.1      | 2.646162657                    | 4.882728704                  |
| P 04792                      | HSPB1                    | 6              | 58.54 | 7q11.23<br>* | 1.895302621                    | 4.832682665                  |
| P31939                       | PIK3CA                   | 13             | 42.96 | 6p12**       | 2.482848283                    | 4.790484985                  |
| Q96QV6                       | HSP90AB1                 | 3              | 31.08 | 2q35         | 2.367371066                    | 4.774690718                  |
| P10401                       | HSPA1A                   | 9              | 29.77 | 6p22.2<br>*  | 2.263034406                    | 4.76700389                   |
| P 19338                      | HSPA1B                   | 5              | 23.01 | 6p22.1<br>*  | 1.992768431                    | 4.679853714                  |
| P 62988                      | PIP2                     | 4              | 38.45 | 2q37.1       | 1.89917563                     | 4.665546249                  |
| P 23284                      | PGK1                     | 3              | 75.01 | 2p16         | 1.831877241                    | 4.590066877                  |
| P14618                       | CASP9                    | 2              | 51.39 | 15q21        | 1.580145484                    | 4.54515514                   |
| P 07237                      | CDC37                    | 7              | 46.89 | 15q22        | 1.565597176                    | 4.494850022                  |
| P04843                       | P4HB                     | 15             | 52.38 | 19q22        | 1.526068812                    | 4.448550002                  |
| Q5VTEO                       | PKM                      | 5              | 39.54 | 1p36.1       | 1.541019153                    | 4.369572125                  |
| P 27797                      | ENO1                     | 11             | 56.2  | 9q34.12      | 1.459431619                    | 4.321481621                  |
| P 00558                      | COL1A1                   | 5              | 33.57 | 19p13.3      | 1.350497247                    | 4.306273051                  |
| 43776                        | PPIB                     | 3              | 55.64 | Xq13.3**     | 1.049630768                    | 4.295849483                  |
| Q 00839                      | ACSL1                    | 1              | 12.77 | 18q21.3      | 1.286881148                    | 4.290730039                  |
| P53999                       | CTSD                     | 2              | 41.99 | 1q44**       | 1.207892852                    | 4.124360063                  |
| P10155                       | HNRNPU                   | 2              | 25.98 | 5p13.3**     | 1.084064265                    | 4.111820506                  |
| P15104                       | TXN                      | 2              | 20.45 | 1q31**       | 2.10433666                     | 4.085656843                  |
| Q 15084                      | AKR1C2                   | 4              | 25.47 | 1q31**       | 1.111031312                    | 4.053547735                  |
| P00338                       | MAPK1                    | 11             | 51.59 | 2p25.1       | 1.298658316                    | 3.995678626                  |
| P07237                       | TYMP                     | 3              | 47.59 | 11p15.4      | 1.5360529                      | 3.869666232                  |
| 14745                        | TKT                      | 15             | 2.9   | 17q25**      | 1.077242999                    | 3.823908741                  |
| Q05682                       | PDIA4                    | 3              | 44.13 | 17q25.1<br>* | 1.782408565                    | 3.821023053                  |
| P 060218                     | SLC9A3R1                 | 3              | 41.49 | 7q33**       | 3.204766751                    | 3.728158393                  |
| Q 04828                      | PIP3                     | 10             | 48.1  | 7q33.1**     | 2.56315813                     | 3.671620397                  |
| P16435                       | TUBA1B                   | 9              | 42.41 | 10p14        | 1.673556424                    | 3.543633967                  |
| P 10809                      | SULT1A4                  | 2              | 18.02 | 7q11.28<br>* | 1.521050737                    | 3.460923901                  |
| P 61604                      | IKBK                     | 24             | 63.7  | 2q33.1       | 1.14404637                     | 3.448550002                  |

|         |          |    |       |                      |             |             |
|---------|----------|----|-------|----------------------|-------------|-------------|
| Q9NS69  | KDR      | 3  | 66.67 | 2q33.1               | 1.201633861 | 3.35261703  |
| P61981  | PDIA6    | 1  | 27.46 | 22q12                | 1.367371066 | 3.222573178 |
| P 06733 | SULT1A2  | 2  | 53.04 | 7q11.25<br>*         | 1.117695043 | 3.216096421 |
| P 0C7M2 | PPIAP22  | 19 | 56.91 | 1p36.2               | 1.765534746 | 3.211124884 |
| P 62937 | TUBAP2   | 3  | 56.56 | 12q13.1              | 1.124328135 | 3.016373713 |
| P 38646 | AKR1C1   | 9  | 81.72 | 7p13                 | 1.244887059 | 3.009217308 |
| P52758  | ENO1-IT1 | 16 | 54.05 | 5q31.1               | 1.416839742 | 2.991399828 |
| P 11021 | MDH2     | 2  | 70.8  | 8q22 <sup>*</sup>    | 1.070389328 | 2.978810701 |
| P 07339 | PIK3R1   | 14 | 50.76 | 9q33.3               | 1.807354922 | 2.974694135 |
| P30837  | AKR7A2   | 9  | 48.3  | 11p15.5              | 1.14404637  | 2.954677021 |
| P 13667 | CALR     | 4  | 34.43 | 9p11.1               | 1.286881148 | 2.931814138 |
| P 40926 | CFL1     | 5  | 33.38 | 7q35 <sup>*</sup>    | 1.500802053 | 2.910094889 |
| Q99471  | APOE     | 8  | 56.51 | 7q22 <sup>*</sup>    | 1.084064265 | 2.906578315 |
| P 02649 | ESPL1    | 1  | 46.75 | 12q12                | 1.49057013  | 2.896196279 |
| P 08107 | NCL      | 5  | 71.61 | 19q13.2              | 1.286881148 | 2.826813732 |
| Q05682  | CALD1    | 10 | 45.09 | 6p21.3 <sup>*</sup>  | 1.007195501 | 2.826813732 |
| P23528  | CKAP4    | 3  | 41.49 | 7q33 <sup>*</sup>    | 1.992768431 | 2.795880017 |
| P20700  | LONP2    | 3  | 42.17 | 11q13                | 1.875780063 | 2.793174124 |
| Q07065  | RNU6-29P | 3  | 38.23 | 5q23.2               | 1.448900951 | 2.790484985 |
| P06899  | AKR1C4   | 3  | 33.89 | 12q23.3              | 2.070389328 | 2.653647026 |
| P19971  | FTCD     | 14 | 72.22 | 6p22.1<br>*          | 1.220329955 | 2.642065153 |
| P62805  | BGN      | 3  | 26,56 | 22q13.3              | 2.364572432 | 2.567030709 |
| P61978  | SHMT1    | 5  | 74.76 | 6p22.1 <sup>*</sup>  | 2.046141782 | 2.559090918 |
| P27824  | HADH     | 4  | 41.9  | 9q21.3               | 1.963474124 | 2.543633967 |
| P55072  | UGP2     | 4  | 22.8  | 5q35                 | 1.739848103 | 2.514278574 |
| P68363  | TGM2     | 3  | 41.81 | 9p13.3               | 1.244887059 | 2.512861625 |
| P10599  | ATIC     | 10 | 44.35 | 12q13.1              | 1.510961919 | 2.474955193 |
| Q14749  | ABAT     | 3  | 58.1  | 9q31                 | 1.97819563  | 2.446116973 |
| P69905  | FLNA     | 2  | 34.92 | 16p12 <sup>*</sup>   | 1.275007047 | 2.437707136 |
| P 11586 | MYH10    | 18 | 56.34 | 16p13.3 <sup>*</sup> | 1.608809243 | 2.436518915 |
| P 68871 | CPT2     | 8  | 40    | 14q24 <sup>*</sup>   | 1.765534746 | 2.37161107  |
| P23786  | HRSP12   | 57 | 89.8  | 11p15.5              | 2.097610797 | 2.364516253 |
| P18206  | NARS     | 2  | 27.66 | 1p32 <sup>*</sup>    | 1.700439718 | 2.354577731 |
| P35580  | ALDOB    | 4  | 36.07 | 10q22.2 <sup>*</sup> | 1.007195501 | 2.347753659 |
| Q9Y2S2  | PGS1     | 6  | 31.73 | 17p13 <sup>*</sup>   | 1.195347598 | 2.258848401 |
| P 05181 | HBG2     | 3  | 21.63 | 13q12.1 <sup>*</sup> | 1.275007047 | 2.229147988 |
| P07099  | SUB1     | 2  | 24.34 | 10q24.3 <sup>*</sup> | 1.560714954 | 2.158015195 |
| Q16696  | GRHPR    | 3  | 33.19 | 1q42.1               | 1.510961919 | 2.153662888 |
| P28332  | CARHSP1  | 2  | 14.37 | 19q13.2 <sup>*</sup> | 1.176322773 | 2.139063379 |
| P 21980 | TROVE2   | 1  | 9.23  | 4q23 <sup>*</sup>    | 1.344828497 | 2.128427064 |

|                                |         |    |       |                      |              |             |
|--------------------------------|---------|----|-------|----------------------|--------------|-------------|
| P 42765                        | COMT    | 3  | 38.14 | 20q12                | 1.269033146  | 2.111259039 |
| P00480                         | HBA1    | 11 | 47.86 | 18q21.1              | 1.3950628    | 2.067526235 |
| P 02671                        | FGB     | 4  | 22.88 | Xp21.1               | 1.416839742  | 2.048662481 |
| P 08670                        | LMNB1   | 9  | 28.98 | 4q28 <sup>*</sup>    | 1.046141782  | 2.037157319 |
| P29401                         | TFG     | 26 | 69.31 | 10p13                | 1.007195501  | 2.026872146 |
| P21549                         | HBB     | 5  | 23.27 | 3p14.3               | 1.070389328  | 1.970616222 |
| P 12111                        | AKR1B10 | 5  | 42.09 | 2q37 <sup>*</sup>    | 1.646162657  | 1.966576245 |
| Q06520                         | ASS1    | 7  | 27.7  | 2q37 <sup>*</sup>    | 1.124328135  | 1.943095149 |
| Q9Y2V2                         | FGA     | 3  | 39.65 | 19q13.3 <sup>*</sup> | 1.364572432  | 1.931814138 |
| P00441                         | HNRNPK  | 2  | 31.97 | 16p13.2 <sup>*</sup> | 1.117695043  | 1.88941029  |
| Q7Z4W1                         | SLC27A5 | 3  | 50.65 | 21q22.1 <sup>*</sup> | 1.232660757  | 1.886056648 |
| P34913                         | AOX1    | 5  | 69.26 | 17q25.3              | 1.03562391   | 1.835647144 |
| Q02318                         | ADH4    | 2  | 28.29 | 8p21.2 <sup>*</sup>  | 1.883620816  | 1.815308569 |
| Q06278                         | ACY1    | 2  | 8.28  | 2q33 <sup>*</sup>    | 1.275007047  | 1.806875402 |
| P35579                         | PHGDH   | 3  | 26.01 | 2q33 <sup>*</sup>    | 1.269033146  | 1.795880017 |
| Q92734                         | ARG1    | 19 | 10.36 | 22q13.1 <sup>*</sup> | 1.275007047  | 1.777283529 |
| P 02675                        | ACAT2   | 3  | 17.25 | 2q12.2 <sup>*</sup>  | 1.819668183  | 1.769551079 |
| P10799                         | IGHA1   | 2  | 27.9  | 4q28 <sup>*</sup>    | 1.327687364  | 1.761953897 |
| <b>Down-regulated proteins</b> |         |    |       |                      |              |             |
| P 08319                        | DAK     | 7  | 60    | 4q22 <sup>*</sup>    | -3.058893689 | 4.829738285 |
| Q03154                         | PCK2    | 7  | 35.29 | 3p21.1               | -1.556393349 | 4.821023053 |
| Q9NY33                         | SORD    | 3  | 27    | 11q12                | -3.836501268 | 4.694648631 |
| O43175                         | PGM1    | 4  | 31.89 | 1p12                 | -2.120294234 | 4.410050399 |
| P05089                         | GSTA1   | 5  | 56.21 | 6q23 <sup>*</sup>    | -1.888968688 | 4.317854924 |
| Q9BWD1                         | ALDH1L1 | 5  | 34.51 | 6q25.3 <sup>*</sup>  | -1.089267338 | 4.268411235 |
| P01876                         | GOT2    | 3  | 42.21 | 14q32.3 <sup>*</sup> | -1.120294234 | 4.193820026 |
| P36776                         | CES1    | 2  | 22.31 | 19p13.2 <sup>*</sup> | -1.395928676 | 3.935542011 |
| P36776                         | PYGL    | 1  | 22.31 | 16q12.1 <sup>*</sup> | -1.395928676 | 3.829738285 |
| P02765                         | ADH1C   | 2  | 17.71 | 3q27                 | -1.836501268 | 3.823908741 |
| P36269                         | SULT1A1 | 1  | 7.58  | 22q11.2 <sup>*</sup> | -2.120294234 | 3.801342913 |
| Q3LXA3                         | ADH1A   | 8  | 48    | 11q12.2              | -1.217591435 | 3.540607512 |
| Q16822                         | BHMT    | 13 | 51.41 | 14q11.2 <sup>*</sup> | -1.556393349 | 3.360513511 |
| P 05062                        | PBLD    | 26 | 56.59 | 9q21.3               | -1.434402824 | 3.179798541 |
| Q00796                         | ECHS1   | 5  | 47.34 | 15q15.3              | -1.434402824 | 3.119186408 |
| Q16851                         | MTHFD1  | 3  | 45.47 | 2p14                 | -1.358453971 | 2.954677021 |
| P 36871                        | VCL     | 8  | 43.95 | 1p31 <sup>*</sup>    | -1.286304185 | 2.910094889 |
| P 08263                        | CRYL1   | 2  | 43.24 | 6p12.1               | -1.286304185 | 2.684029655 |
| P 21333                        | EPHX1   | 12 | 29.4  | Xq28                 | -2.556393349 | 2.628932138 |
| 95954                          | CYP2A13 | 10 | 65.43 | 21q22.3 <sup>*</sup> | -1.836501268 | 2.600326279 |
| P 00966                        | ADH6    | 3  | 34.47 | 9q34.1               | -1.736965594 | 2.591760035 |
| 75891                          | ACAA2   | 3  | 30.93 | 3q21.3               | -1.120294234 | 2.591760035 |
| P 00505                        | OTC     | 4  | 50    | 16q21 <sup>*</sup>   | -1.152003093 | 2.455931956 |

|         |         |    |       |                      |              |             |
|---------|---------|----|-------|----------------------|--------------|-------------|
| P23141  | VIM     | 11 | 50.44 | 16q22.2 <sup>*</sup> | -1.152003093 | 2.431798276 |
| P 05091 | COL6A3  | 11 | 59.38 | 12q24.2              | -1.029146346 | 2.420216403 |
| P06737  | SULT2A1 | 1  | 24.44 | 14q21 <sup>*</sup>   | -1.152003093 | 2.408935393 |
| P 00326 | SOD1    | 4  | 38.13 | 4q23 <sup>*</sup>    | -4.321928095 | 2.399027104 |
| P 21810 | DCXR    | 3  | 26.63 | 17q25.3              | -2.473931188 | 2.375717904 |
| Q16836  | EPHX2   | 2  | 33.76 | 4q22 <sup>*</sup>    | -1.251538767 | 2.344861565 |
| Q9Y2P5  | CYP27A1 | 2  | 15.07 | 19q13.4 <sup>*</sup> | -1.395928676 | 2.269217724 |
| P 33121 | MYH9    | 5  | 36.82 | 4q35 <sup>*</sup>    | -2.321928095 | 2.134896025 |
| P50225  | PKM2    | 2  | 36.61 | 16p21.2 <sup>*</sup> | -1.358453971 | 2.049148541 |
| P 80404 | PDIA1   | 3  | 30.6  | 16p13.2 <sup>*</sup> | -1.217591435 | 1.920818754 |
| P02452  | GLUL    | 3  | 50.82 | 17q21.3              | -2.120294234 | 1.913640169 |
| P43488  | LDHA    | 3  | 34.82 | 1p36.1 <sup>*</sup>  | -3.184424571 | 1.896196279 |
| Q9UBQ7  | PRO     | 3  | 24.7  | 9q12                 | -1.089267338 | 1.696803943 |
| P21810  | TOMM22  | 3  | 15.22 | Xq28 <sup>*</sup>    | -2.473931188 | 1.576754126 |
| P07327  | YWHAG   | 4  | 32    | 4q23 <sup>*</sup>    | -2.473931188 | 1.496209317 |
| P69892  | PPIA    | 5  | 48.33 | 11p15.5              | -1.434402824 | 1.465973894 |
| Q93088  | GRP75   | 8  | 49.75 | 5q13.3               | -1.59946207  | 1.335358024 |
| P21964  | GRP78)  | 1  | 12.92 | 22q11.2 <sup>*</sup> | -1.089267338 | 1.701146924 |
| P34896  | ALDH1B1 | 2  | 18.43 | 17p12 <sup>*</sup>   | -2.395928676 | 1.688246139 |
| P30039  | PFDN5   | 2  | 27.78 | 10q21.3 <sup>*</sup> | -1.434402824 | 1.688246139 |
| P30084  | CANX    | 6  | 23.79 | 10q26.2 <sup>*</sup> | -2.395928676 | 1.679853714 |

**Table S2.** Analysis of gene ontology (molecular function, biological process and cellular component) and pathway enrichment based on proteins up-regulated in HCC patients in the presence of depression.

| Cellular component | No. genes | Fold enrichment | P value (Hypergeometric test) | Bonferroni method | BH method | Q-value (Storey-Tibshirani method) | Genes                                                                                                                                                                                                                                                                                                                                                                                                                                      |
|--------------------|-----------|-----------------|-------------------------------|-------------------|-----------|------------------------------------|--------------------------------------------------------------------------------------------------------------------------------------------------------------------------------------------------------------------------------------------------------------------------------------------------------------------------------------------------------------------------------------------------------------------------------------------|
| Cytosol            | 28        | 5.37865422      | 6.21E-14                      | 4.87E-11          | 9.88E-12  | 6.21432E-11                        | HSP90AA1; HSPA8; PIK3CA; HSP90AB1; HSPA1A; CASP9; PKM; PPIB; ACSL1; TXN; AKR1C2; MAPK1; TKT; TUBA1B; SULT1A4; IKBKG; AKR1C1; PIK3R1; CALR; CFL1; AKR1C4; SHMT1; FLNA; NARS; COMT; ASS1; ACY1; PHGDH;                                                                                                                                                                                                                                       |
| Cytoplasm          | 63        | 2.50763395      | 2.49E-17                      | 1.95E-14          | 6.51E-15  | 4.09501E-14                        | HSP90AA1; HSPA8; HSPB1; HSP90AB1; HSPA1A; HSPA1B; PGK1; CASP9; CDC37; P4HB; PKM; ENO1; PPIB; CTSD; HNRNPU; TXN; MAPK1; TYMP; TKT; SLC9A3R1; TUBA1B; SULT1A4; IKBKG; SULT1A2; AKR1C1; PIK3R1; AKR7A2; CALR; CFL1; APOE; NCL; CALD1; CKAP4; AKR1C4; FTCD; SHMT1; HADH; UGP2; TGM2; ATIC; FLNA; MYH10; HRSP12; NARS; ALDOB; SUB1; GRHPR; CARHSP1; TROVE2; COMT; HBA1; FGB; LMNB1; TFG; HBB; FGA; HNRNPK; AOX1; ADH4; ACY1; ARG1; ACAT2; AHSG; |
| Exosomes           | 53        | 5.86944187      | 1.08E-30                      | 8.49E-28          | 8.49E-28  | 5.3407E-27                         | HSP90AA1; HSPA8; HSPB1; HSP90AB1; HSPA1A; HSPA1B; PGK1; CASP9; CDC37; P4HB;                                                                                                                                                                                                                                                                                                                                                                |

|                           |                  |                        |                                      |                          |                  |                                           |                                                                                                                                                                                                                                                                                                                          |
|---------------------------|------------------|------------------------|--------------------------------------|--------------------------|------------------|-------------------------------------------|--------------------------------------------------------------------------------------------------------------------------------------------------------------------------------------------------------------------------------------------------------------------------------------------------------------------------|
|                           |                  |                        |                                      |                          |                  |                                           | PKM; ENO1; PPIB; CTSD;<br>TXN; TKT; PDIA4;<br>SLC9A3R1; TUBA1B;<br>PDIA6; MDH2; AKR7A2;<br>CALR; CFL1; APOE; NCL;<br>CKAP4; FTCD; BGN;<br>SHMT1; UGP2; TGM2;<br>ATIC; FLNA; MYH10;<br>HRSP12; NARS; ALDOB;<br>SUB1; GRHPR; COMT;<br>HBA1; FGB; HBB;<br>AKR1B10; ASS1; FGA;<br>HNRNPK; AOX1; ACY1;<br>PHGDH; ACAT2; AHS;G |
| Lysosome                  | 38               | 5.30749591             | 4.04E-19                             | 3.17E-16                 | 1.58E-16         | 9.96102E-16                               | HSP90AA1; HSPA8;<br>HSPB1; HSPA1A; HSPA1B;<br>PGK1; P4HB; PKM; ENO1;<br>PPIB; CTSD; TYMP; TKT;<br>PDIA6; MDH2; AKR7A2;<br>CALR; CFL1; CKAP4;<br>HADH; UGP2; TGM2;<br>ATIC; FLNA; MYH10;<br>CPT2; HBG2; GRHPR;<br>COMT; HBA1; HBB; ASS1;<br>FGA; HNRNPK; ARG1;<br>LONP1; AHS;G; GGT5;                                     |
| Centrosome                | 22               | 7.58960331             | 6.3E-14                              | 4.94E-11                 | 9.88E-12         | 6.21432E-11                               | HSP90AA1; PDK1; HSPA8;<br>HSP90AB1; PGK1; ENO1;<br>HNRNPU; TXN; MAPK1;<br>TKT; TUBA1B; CFL1;<br>ESPL1; NCL; HADH; ATIC;<br>MYH10; SUB1; CARHSP1;<br>LMNB1; HNRNPK;<br>PHGDH;                                                                                                                                             |
| <b>Molecular function</b> | <b>No. genes</b> | <b>Fold enrichment</b> | <b>P value (Hypergeometric test)</b> | <b>Bonferroni method</b> | <b>BH method</b> | <b>Q-value (Storey-Tibshirani method)</b> | <b>Genes</b>                                                                                                                                                                                                                                                                                                             |
| Ligase activity           | 3                | 6.07881872             | 0.013443                             | 1                        | 0.563856         | 1                                         | ACSL1; NARS; ASS1;                                                                                                                                                                                                                                                                                                       |
| Transaminase activity     | 2                | 19.7600907             | 0.004599                             | 1                        | 0.343409         | 1                                         | TGM2; ABAT;                                                                                                                                                                                                                                                                                                              |
| Catalytic activity        | 16               | 6.80739624             | 1.27E-09                             | 2.85E-07                 | 2.85E-07         | 1.62763E-06                               | PDK1; PGK1; PKM; ENO1;                                                                                                                                                                                                                                                                                                   |



|                                                                        |                      |                            |                                               |                              |                  |                                                    |                                                                                                                                                                                                                                                      |
|------------------------------------------------------------------------|----------------------|----------------------------|-----------------------------------------------|------------------------------|------------------|----------------------------------------------------|------------------------------------------------------------------------------------------------------------------------------------------------------------------------------------------------------------------------------------------------------|
|                                                                        |                      |                            |                                               |                              |                  |                                                    | TXN; AKR1C1; MDH2;<br>AKR7A2; AKR1C4; PGS1;<br>GRHPR; AKR1B10; ASS1;<br>AOX1; ADH4; PHGDH;                                                                                                                                                           |
| Chaperone activity                                                     | 9                    | 16.1744407                 | 4.52E-09                                      | 1.01E-06                     | 5.06E-07         | 2.88795E-06                                        | HSP90AA1; HSPB1;<br>HSP90AB1; HSPA1A;<br>HSPA1B; CDC37; PPIB;<br>PDIA4; CALR;                                                                                                                                                                        |
| Transferase activity,<br>transferring<br>aldehyde or ketonic<br>groups | 1                    | 75.9039492                 | 0.013203                                      | 1                            | 0.563856         | 1                                                  | TKT;                                                                                                                                                                                                                                                 |
| <b>Biological process</b>                                              | <b>No.<br/>genes</b> | <b>Fold<br/>enrichment</b> | <b>P value<br/>(Hypergeomet<br/>ric test)</b> | <b>Bonferroni<br/>method</b> | <b>BH method</b> | <b>Q-value<br/>(Storey-Tibshir<br/>ani method)</b> | <b>Genes</b>                                                                                                                                                                                                                                         |
| Protein metabolism                                                     | 19                   | 3.25033769                 | 3.88E-06                                      | 0.000691                     | 0.00023          | 0.001521699                                        | HSP90AA1; HSPA8;<br>HSPB1; HSPA1A; HSPA1B;<br>CDC37; P4HB; PPIB; CTSD;<br>PDIA4; PDIA6; CALR;<br>ESPL1; LONP2; HRSP12;<br>NARS; FGB; FGA; LONP1;                                                                                                     |
| Metabolism                                                             | 33                   | 4.43678436                 | 4.01E-14                                      | 7.14E-12                     | 3.57E-12         | 2.35774E-11                                        | PDK1; PGK1; PKM; ENO1;<br>ACSL1; TXN; AKR1C2;<br>TKT; AKR1C1; MDH2;<br>AKR7A2; AKR1C4; FTCD;<br>SHMT1; UGP2; TGM2;<br>ATIC; ABAT; CPT2;<br>ALDOB; PGS1; GRHPR;<br>COMT; AKR1B10; ASS1;<br>SLC27A5; AOX1; ADH4;<br>ACY1; PHGDH; ARG1;<br>ACAT2; GGT5; |
| Energy pathways                                                        | 33                   | 4.57263119                 | 1.69E-14                                      | 3.02E-12                     | 3.02E-12         | 1.9909E-11                                         | PDK1; PGK1; PKM; ENO1;<br>ACSL1; TXN; TKT;<br>SULT1A2; AKR1C1;<br>MDH2; AKR7A2; AKR1C4;<br>FTCD; SHMT1; UGP2;<br>TGM2; ATIC; ABAT; CPT2;<br>ALDOB; PGS1; GRHPR;<br>COMT; AKR1B10; ASS1;<br>SLC27A5; AOX1; ADH4;                                      |

|                                                |                  |                        |                                      |                          |                  |                                           |                                                                                                                                                                                                              |
|------------------------------------------------|------------------|------------------------|--------------------------------------|--------------------------|------------------|-------------------------------------------|--------------------------------------------------------------------------------------------------------------------------------------------------------------------------------------------------------------|
|                                                |                  |                        |                                      |                          |                  |                                           | ACY1; PHGDH; ARG1;<br>ACAT2; GGT5;                                                                                                                                                                           |
| Amino acid and derivative metabolism           | 1                | 56.9752835             | 0.017565                             | 1                        | 0.781651         | 1                                         | FTCD;                                                                                                                                                                                                        |
| Xenobiotic metabolism                          | 1                | 38.0151226             | 0.026233                             | 1                        | 0.933898         | 1                                         | SULT1A4;                                                                                                                                                                                                     |
| <b>KEGG pathway</b>                            | <b>No. genes</b> | <b>Fold enrichment</b> | <b>P value (Hypergeometric test)</b> | <b>Bonferroni method</b> | <b>BH method</b> | <b>Q-value (Storey-Tibshirani method)</b> | <b>Genes</b>                                                                                                                                                                                                 |
| Syndecan-1-mediated signaling events           | 26               | 4.53634965             | 2.94E-11                             | 4.9E-08                  | 8.28E-09         | 4.1273E-08                                | HSP90AA1; HSPA8;<br>HSPB1; PIK3CA; HSPA1A;<br>HSPA1B; PGK1; CASP9;<br>PKM; ENO1; COL1A1;<br>PIIB; CTSD; TXN; MAPK1;<br>SLC9A3R1; IKBKG; KDR;<br>PIK3R1; NCL; SHMT1;<br>HBG2; FGB; FGA; ARG1;<br>AHSG;        |
| Signaling events mediated by VEGFR1 and VEGFR2 | 26               | 4.55038311             | 2.74E-11                             | 4.58E-08                 | 8.28E-09         | 4.1273E-08                                | HSP90AA1; HSPA8;<br>HSPB1; PIK3CA;<br>HSP90AB1; HSPA1A;<br>HSPA1B; PGK1; CASP9;<br>PKM; ENO1; COL1A1;<br>CTSD; TXN; MAPK1;<br>SLC9A3R1; IKBKG; KDR;<br>PIK3R1; NCL; SHMT1;<br>HBG2; FGB; FGA; ARG1;<br>AHSG; |
| VEGF and VEGFR signaling network               | 26               | 4.52240249             | 3.15E-11                             | 5.25E-08                 | 8.28E-09         | 4.1273E-08                                | HSP90AA1; HSPA8;<br>HSPB1; PIK3CA;<br>HSP90AB1; HSPA1A;<br>HSPA1B; PGK1; CASP9;<br>PKM; ENO1; COL1A1;<br>CTSD; TXN; MAPK1;<br>SLC9A3R1; IKBKG; KDR;<br>PIK3R1; NCL; SHMT1;<br>HBG2; FGB; FGA; ARG1;<br>AHSG; |
| Alpha9 beta1 integrin signaling                | 26               | 4.51892909             | 3.2E-11                              | 5.34E-08                 | 8.28E-09         | 4.1273E-08                                | HSP90AA1; HSPA8;<br>HSPB1; PIK3CA; HSPA1A;                                                                                                                                                                   |

|                                                       |    |            |          |          |          |            |                                                                                                                                                                                                             |
|-------------------------------------------------------|----|------------|----------|----------|----------|------------|-------------------------------------------------------------------------------------------------------------------------------------------------------------------------------------------------------------|
| events                                                |    |            |          |          |          |            | HSPA1B; PGK1; CASP9;<br>PKM; ENO1; COL1A1;<br>CTSD; TXN; MAPK1;<br>SLC9A3R1; IKBKG; KDR;<br>PIK3R1; NCL; SHMT1;<br>TGM2; HBG2; FGB; FGA;<br>ARG1; AHSG;                                                     |
| Proteoglycan<br>syndecan-mediated<br>signaling events | 27 | 4.55279742 | 9.97E-12 | 1.66E-08 | 8.28E-09 | 4.1273E-08 | HSP90AA1; HSPA8;<br>HSPB1; PIK3CA; HSPA1A;<br>HSPA1B; PGK1; CASP9;<br>PKM; ENO1; COL1A1;<br>PIIB; CTSD; TXN; MAPK1;<br>SLC9A3R1; IKBKG; KDR;<br>PIK3R1; NCL; SHMT1;<br>FLNA; HBG2; FGB; FGA;<br>ARG1; AHSG; |
| LKB1 signaling<br>events                              | 26 | 4.50854082 | 3.37E-11 | 5.62E-08 | 8.28E-09 | 4.1273E-08 | HSP90AA1; HSPA8;<br>HSPB1; PIK3CA; HSPA1A;<br>HSPA1B; PGK1; CASP9;<br>CDC37; PKM; ENO1;<br>COL1A1; CTSD; TXN;<br>MAPK1; SLC9A3R1;<br>IKBKG; KDR; PIK3R1;<br>NCL; SHMT1; HBG2; FGB;<br>FGA; ARG1; AHSG;      |

**Table S3.** Analysis of gene ontology (molecular function, biological process and cellular component) and pathway enrichment based on proteins down-regulated in HCC patients in the presence of depression.

| Cellular component    | No. genes | Fold enrichment | P value (Hypergeometric test) | Bonferroni method | BH method | Q-value (Storey-Tibshirani method) | Genes                                                                                                                                                             |
|-----------------------|-----------|-----------------|-------------------------------|-------------------|-----------|------------------------------------|-------------------------------------------------------------------------------------------------------------------------------------------------------------------|
| Mitochondrion         | 16        | 6.43344797      | 5.83E-10                      | 4.57E-07          | 2.29E-07  | 1.49477E-06                        | PCK2; GOT2; ECHS1; MTHFD1; ACAA2; OTC; VIM; SOD1; DCXR; CYP27A1; MYH9; GLUL; TOMM22; PPIA; ALDH1B1; CANX;                                                         |
| Cytosol               | 13        | 5.58740253      | 2.05E-07                      | 0.000161          | 4.03E-05  | 0.000263169                        | PCK2; PGM1; MTHFD1; VCL; VIM; SULT2A1; SOD1; EPHX2; MYH9; GLUL; LDHA; YWHAG; PPIA;                                                                                |
| Exosomes              | 25        | 6.19333882      | 5.4E-16                       | 4.24E-13          | 4.24E-13  | 2.7686E-12                         | SORD; PGM1; GSTA1; ALDH1L1; GOT2; PYGL; BHMT; PBLD; MTHFD1; VCL; CRYL1; ADH6; ACAA2; VIM; COL6A3; SOD1; DCXR; EPHX2; MYH9; GLUL; LDHA; TOMM22; YWHAG; PPIA; CANX; |
| Lysosome              | 15        | 4.68753623      | 1.72E-07                      | 0.000135          | 4.03E-05  | 0.000263169                        | PGM1; GOT2; ECHS1; MTHFD1; VCL; EPHX1; COL6A3; SOD1; DCXR; MYH9; LDHA; TOMM22; YWHAG; PPIA; CANX;                                                                 |
| Mitochondrial matrix  | 5         | 32.0802175      | 4.65E-07                      | 0.000364          | 7.28E-05  | 0.000476063                        | GOT2; ECHS1; OTC; SOD1; CYP27A1;                                                                                                                                  |
| Molecular function    | No. genes | Fold enrichment | P value (Hypergeometric test) | Bonferroni method | BH method | Q-value (Storey-Tibshirani method) | Genes                                                                                                                                                             |
| Transaminase activity | 2         | 44.1937729      | 0.000937                      | 0.209914          | 0.069971  | 0.443756146                        | GOT2; GLUL;                                                                                                                                                       |
| Catalytic activity    | 10        | 9.51910073      | 5.68E-08                      | 1.27E-05          | 1.27E-05  | 8.07559E-05                        | PCK2; SORD; PGM1; ALDH1L1; ADH1C; ECHS1; MTHFD1; ADH6; LDHA; ALDH1B1;                                                                                             |
| Oxidoreductase        | 5         | 15.7422395      | 1.55E-05                      | 0.003476          | 0.001738  | 0.011023622                        | ADH1A; CRYL1;                                                                                                                                                     |

|                                             |                  |                        |                                      |                          |                  |                                           |                                                                                                                                                                                                                                     |
|---------------------------------------------|------------------|------------------------|--------------------------------------|--------------------------|------------------|-------------------------------------------|-------------------------------------------------------------------------------------------------------------------------------------------------------------------------------------------------------------------------------------|
| activity                                    |                  |                        |                                      |                          |                  |                                           | CYP2A13; DCXR;<br>CYP27A1;                                                                                                                                                                                                          |
| Carboxyl- and carbamoyltransferase activity | 1                | 254.218386             | 0.003948                             | 0.884432                 | 0.22029          | 1                                         | OTC;                                                                                                                                                                                                                                |
| Sulfotransferase activity                   | 2                | 19.1831487             | 0.004917                             | 1                        | 0.22029          | 1                                         | SULT1A1; SULT2A1;                                                                                                                                                                                                                   |
| <b>Biological process</b>                   | <b>No. genes</b> | <b>Fold enrichment</b> | <b>P value (Hypergeometric test)</b> | <b>Bonferroni method</b> | <b>BH method</b> | <b>Q-value (Storey-Tibshirani method)</b> | <b>Genes</b>                                                                                                                                                                                                                        |
| Metabolism                                  | 28               | 8.4199217              | 3.86E-22                             | 6.87E-20                 | 6.87E-20         | 4.63479E-19                               | PCK2; SORD; PGM1;<br>GSTA1; ALDH1L1;<br>GOT2; CES1; PYGL;<br>ADH1C; SULT1A1;<br>ADH1A; BHMT; ECHS1;<br>MTHFD1; CRYL1;<br>EPHX1; CYP2A13;<br>ADH6; ACAA2; OTC;<br>SULT2A1; SOD1; DCXR;<br>EPHX2; CYP27A1;<br>GLUL; LDHA;<br>ALDH1B1; |
| Energy pathways                             | 27               | 8.36791732             | 4.74E-21                             | 8.44E-19                 | 4.22E-19         | 2.84643E-18                               | PCK2; SORD; PGM1;<br>GSTA1; ALDH1L1;<br>GOT2; PYGL; ADH1C;<br>SULT1A1; ADH1A;<br>BHMT; ECHS1;<br>MTHFD1; CRYL1;<br>EPHX1; CYP2A13;<br>ADH6; ACAA2; OTC;<br>SULT2A1; SOD1; DCXR;<br>EPHX2; CYP27A1;<br>GLUL; LDHA;<br>ALDH1B1;       |
| Cell growth and/or maintenance              | 4                | 1.80330684             | 0.180257                             | 1                        | 1                | 1                                         | VCL; VIM; COL6A3;<br>MYH9;                                                                                                                                                                                                          |
| Protein folding                             | 2                | 63.5164718             | 0.000448                             | 0.079811                 | 0.026604         | 0.179376121                               | PPIA; CANX;                                                                                                                                                                                                                         |
| Peptide metabolism                          | 1                | 127.426173             | 0.007882                             | 1                        | 0.350728         | 1                                         | PPIA;                                                                                                                                                                                                                               |
| <b>KEGG pathway</b>                         | <b>No. genes</b> | <b>Fold enrichment</b> | <b>P value (Hypergeometric test)</b> | <b>Bonferroni method</b> | <b>BH method</b> | <b>Q-value (Storey-Tibshirani method)</b> | <b>Genes</b>                                                                                                                                                                                                                        |
| Platelet degranulation                      | 3                | 54.3669572             | 2.25E-05                             | 0.037595                 | 0.010235         | 0.061849128                               | VCL; SOD1; PPIA;                                                                                                                                                                                                                    |

|                                                          |   |            |          |          |          |             |                                                                                 |
|----------------------------------------------------------|---|------------|----------|----------|----------|-------------|---------------------------------------------------------------------------------|
| Response to elevated platelet cytosolic Ca <sup>2+</sup> | 3 | 39.0366181 | 6.19E-05 | 0.103317 | 0.01476  | 0.089189143 | VCL; SOD1; PPIA;                                                                |
| Metabolism                                               | 9 | 5.53861681 | 2.45E-05 | 0.040941 | 0.010235 | 0.061849128 | GSTA1; GOT2;<br>SULT1A1; MTHFD1;<br>CYP2A13; OTC;<br>SULT2A1; CYP27A1;<br>GLUL; |
| Phase II conjugation                                     | 3 | 39.0366181 | 6.19E-05 | 0.103317 | 0.01476  | 0.089189143 | GSTA1; SULT1A1;<br>SULT2A1;                                                     |
| Biological oxidations                                    | 5 | 25.8612181 | 1.36E-06 | 0.002272 | 0.002272 | 0.013731392 | GSTA1; SULT1A1;<br>CYP2A13; SULT2A1;<br>CYP27A1;                                |
| Glucose metabolism                                       | 3 | 42.2887662 | 4.86E-05 | 0.081049 | 0.01476  | 0.089189143 | PCK2; GOT2; PYGL;                                                               |
